# Supplementary material for: Biannual Spawning and Temporal Reproductive Isolation in Acropora Corals
Source: PubMed Central journal article supplement (PMC4786224; doi:10.1371/journal.pone.0150916), 2016-03-10

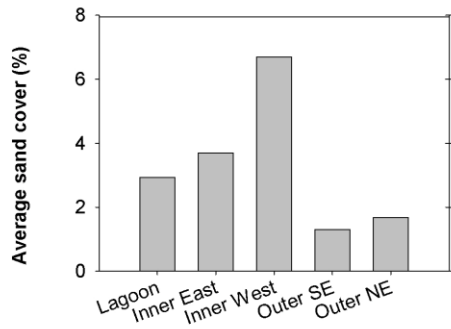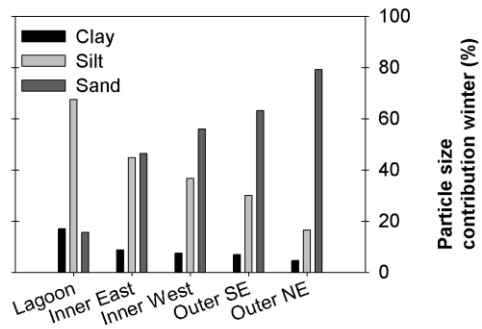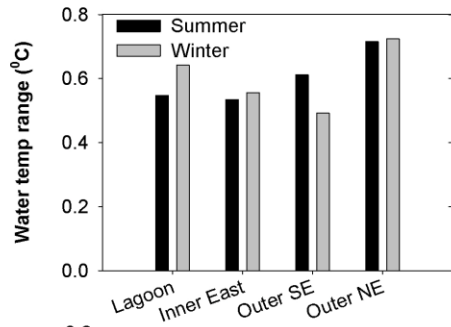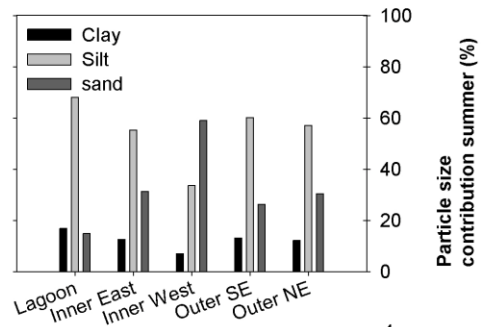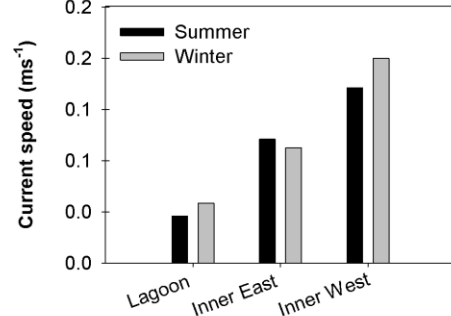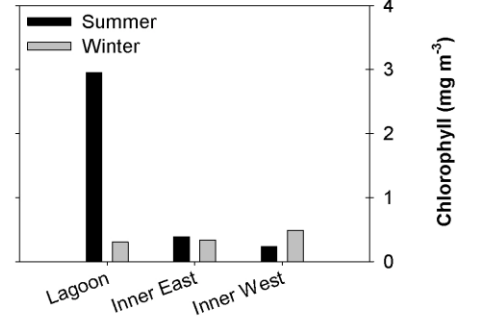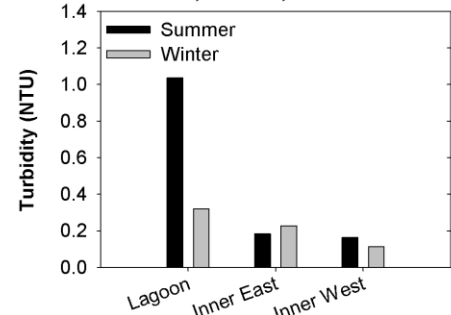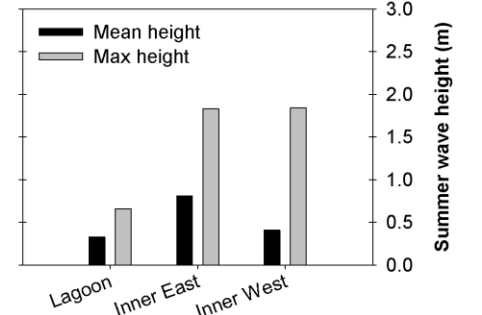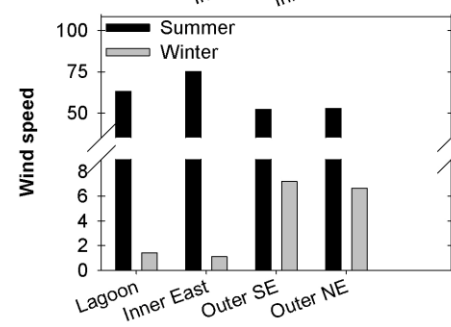

Supplement: pone.0150916.s001.pdf [file pone.0150916.s001.pdf]
