# Supplementary material for: Biannual Spawning and Temporal Reproductive Isolation in Acropora Corals
Source: PubMed Central journal article supplement (PMC4786224; doi:10.1371/journal.pone.0150916), 2016-03-10
Supplement: pone.0150916.s003.pdf [file pone.0150916.s003.pdf]

| Spawning season      |                       | <i>Acr_53</i> | <i>Amil2_10</i> | <i>Amil2_011</i> | <i>Amil2_012</i> | <i>Amil2_018</i> | <i>All loci</i> | <i>P<sub>V</sub>A</i> |
|----------------------|-----------------------|---------------|-----------------|------------------|------------------|------------------|-----------------|-----------------------|
| <b>Autumn (n=25)</b> | <i>A</i>              | 3.0           | 3.0             | 4.0              | 3.0              | 4.0              | 3.4             | 2.0                   |
|                      | <i>H<sub>O</sub></i>  | 0.542         | 0.174           | 0.440            | 0.440            | 0.455            | 0.410           |                       |
|                      | <i>H<sub>E</sub></i>  | 0.494         | 0.419           | 0.657            | 0.503            | 0.524            | 0.519           |                       |
|                      | <i>F<sub>IS</sub></i> | -0.097        | <b>0.585</b>    | <b>0.330</b>     | 0.126            | 0.132            | <b>0.215</b>    |                       |
| <b>Spring (n=24)</b> | <i>A</i>              | 3.0           | 8.0             | 6.0              | 5.0              | 4.0              | 5.2             | 12.0                  |
|                      | <i>H<sub>O</sub></i>  | 0.125         | 0.591           | 0.182            | 0.375            | 0.286            | 0.312           |                       |
|                      | <i>H<sub>E</sub></i>  | 0.119         | 0.549           | 0.419            | 0.576            | 0.516            | 0.436           |                       |
|                      | <i>F<sub>IS</sub></i> | -0.051        | -0.077          | <b>0.567</b>     | 0.349            | <b>0.446</b>     | <b>0.247</b>    |                       |
